# Supplementary material
Source: PubMed Central journal article supplement (PMC2427356)

## SUPPLEMENTARY DATA

*J. Biol. Chem.* (2008) **283**, 000-000

### **Development of Oxidative Stress by Cytochrome P450 Induction in Rodents is Selective for Barbiturates and Related to Loss of Pyridine Nucleotide Dependent Protective Systems**

Miroslav Dostalek, Klarissa D. Hardy, Ginger L. Milne, Jason D. Morrow, Chi Chen, Frank J. Gonzalez, Jun Gu, Xinxin Ding, Delinda A. Johnson, Jeffrey A. Johnson, Martha V. Martin, and F. Peter Guengerich

#### CONTENTS

FIGURE S1. Abbreviated microarray results for C57BL/6 mice.

FIGURE S2. Expanded microarray results for C57BL/6 mice.

FIGURE S3. Focused microarray results for C57BL/6 mice.





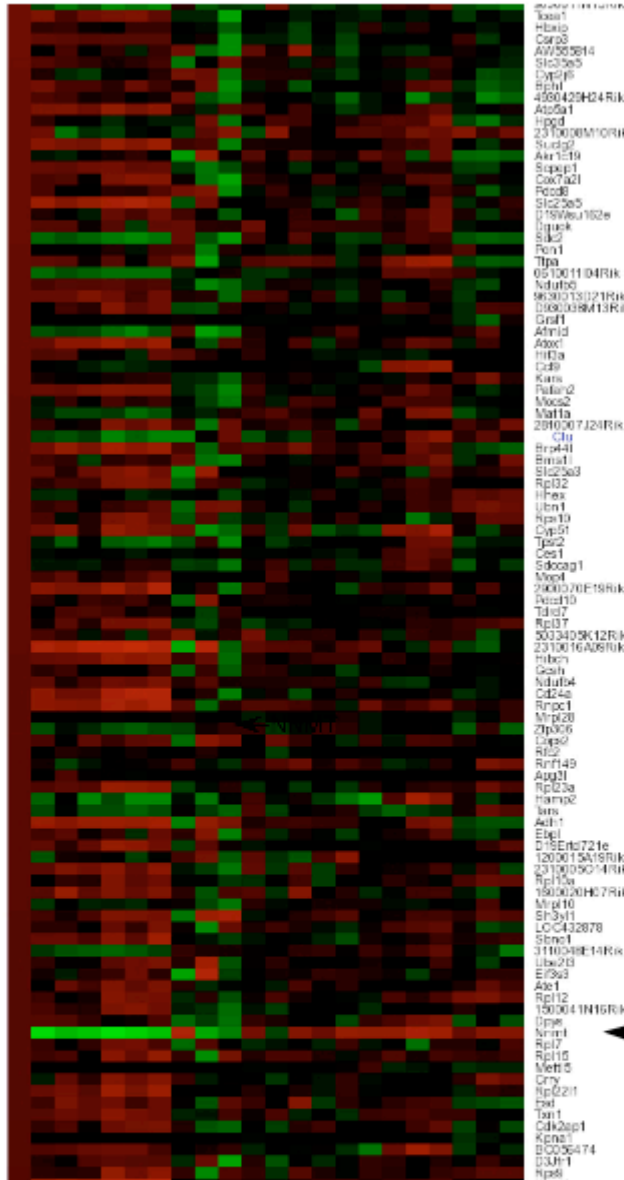

← NNMT

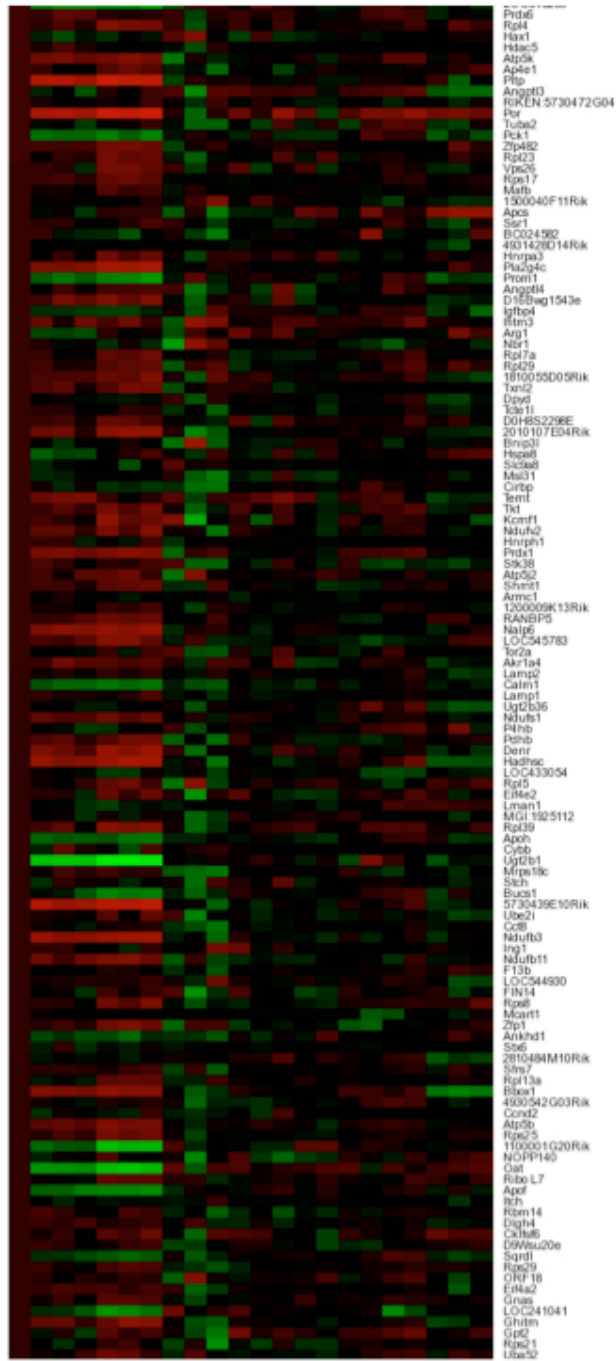

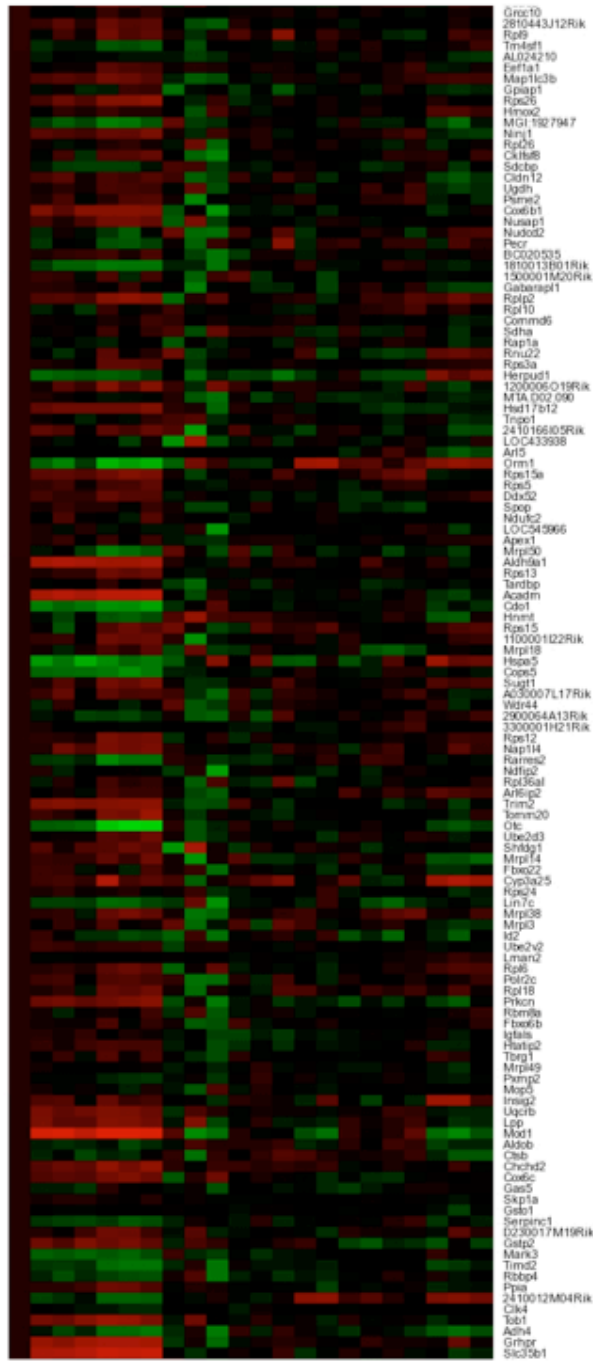

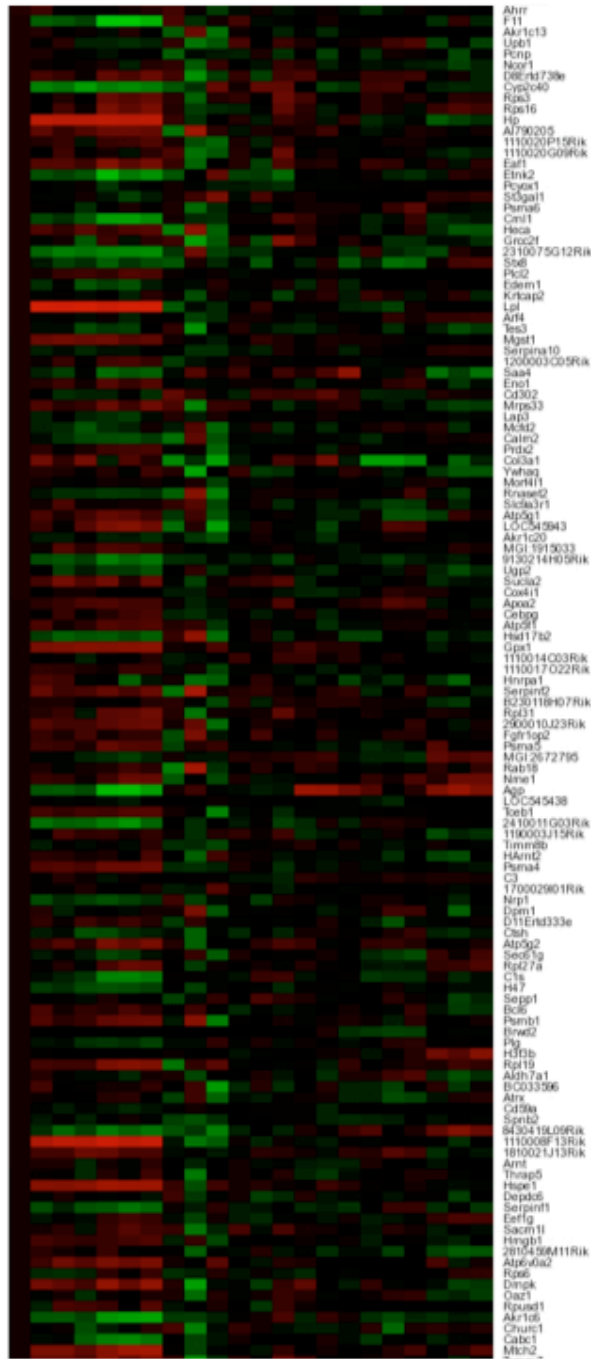

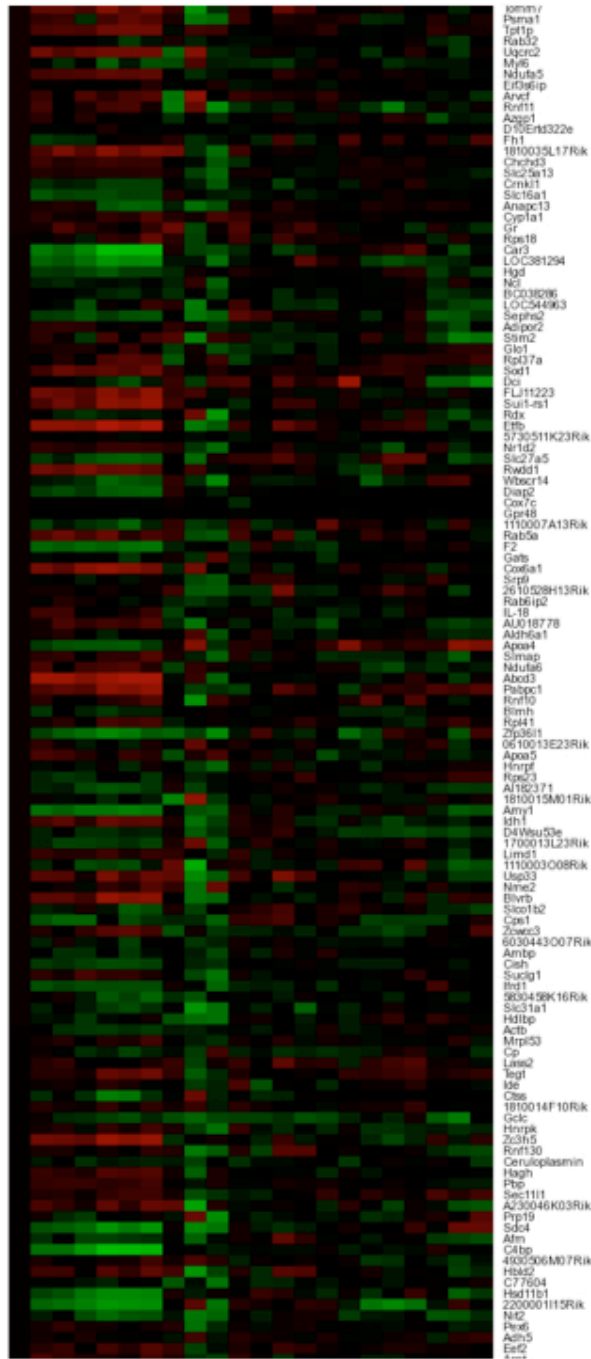



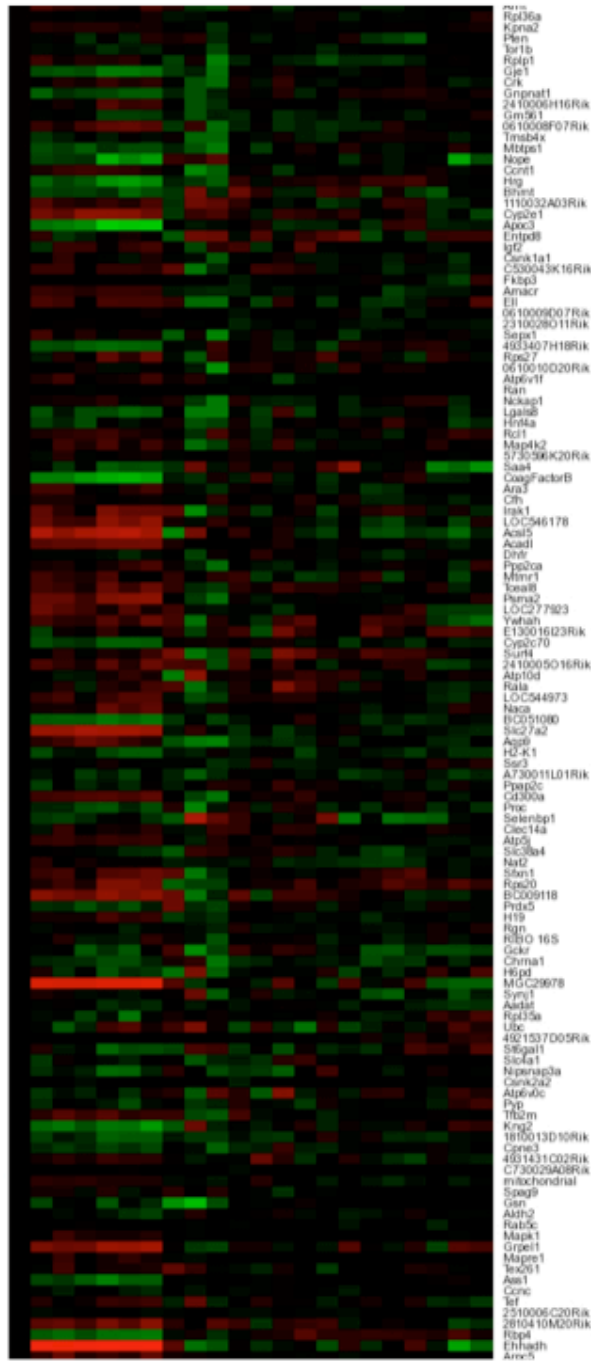

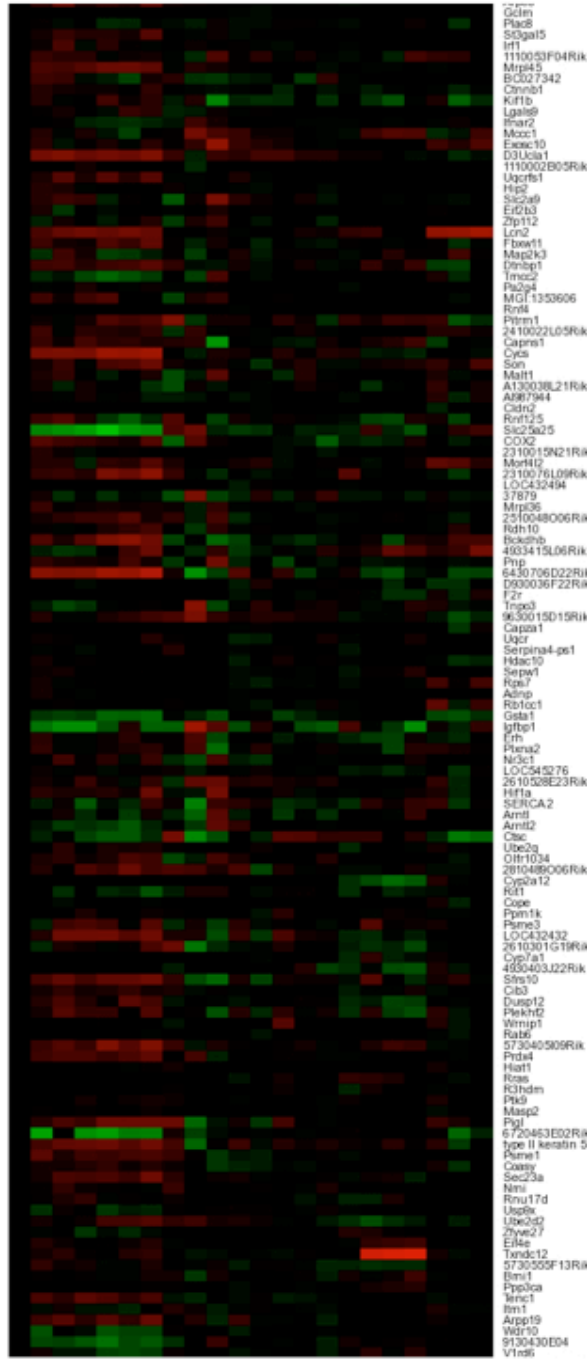

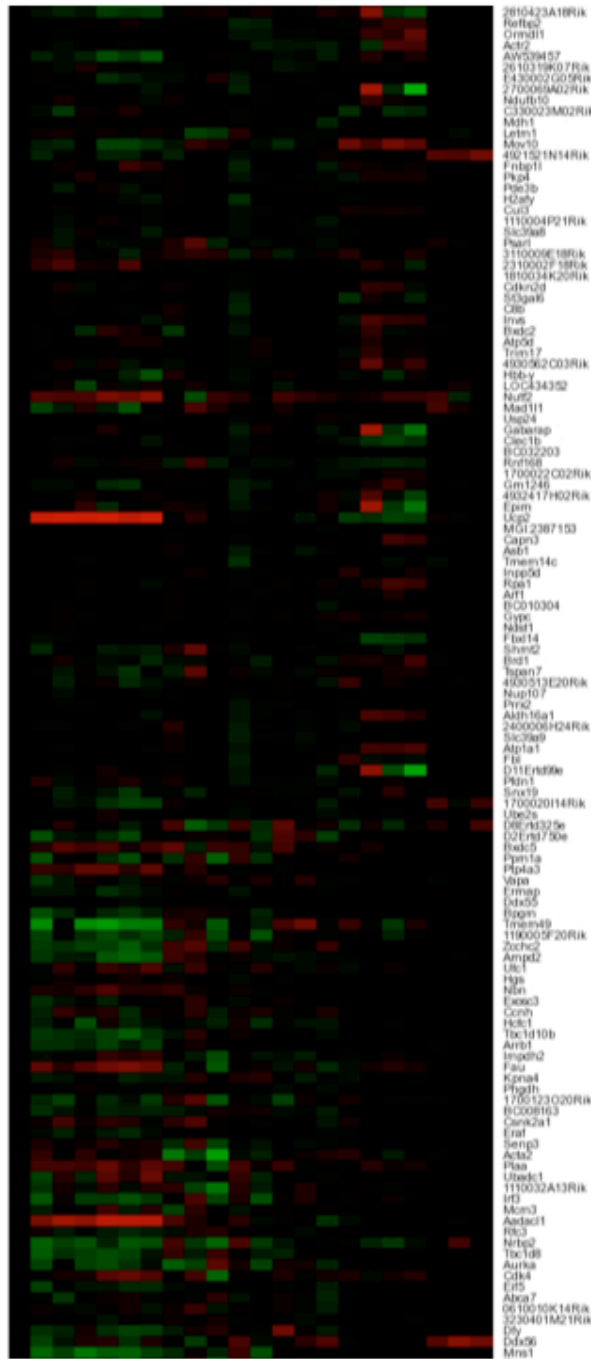

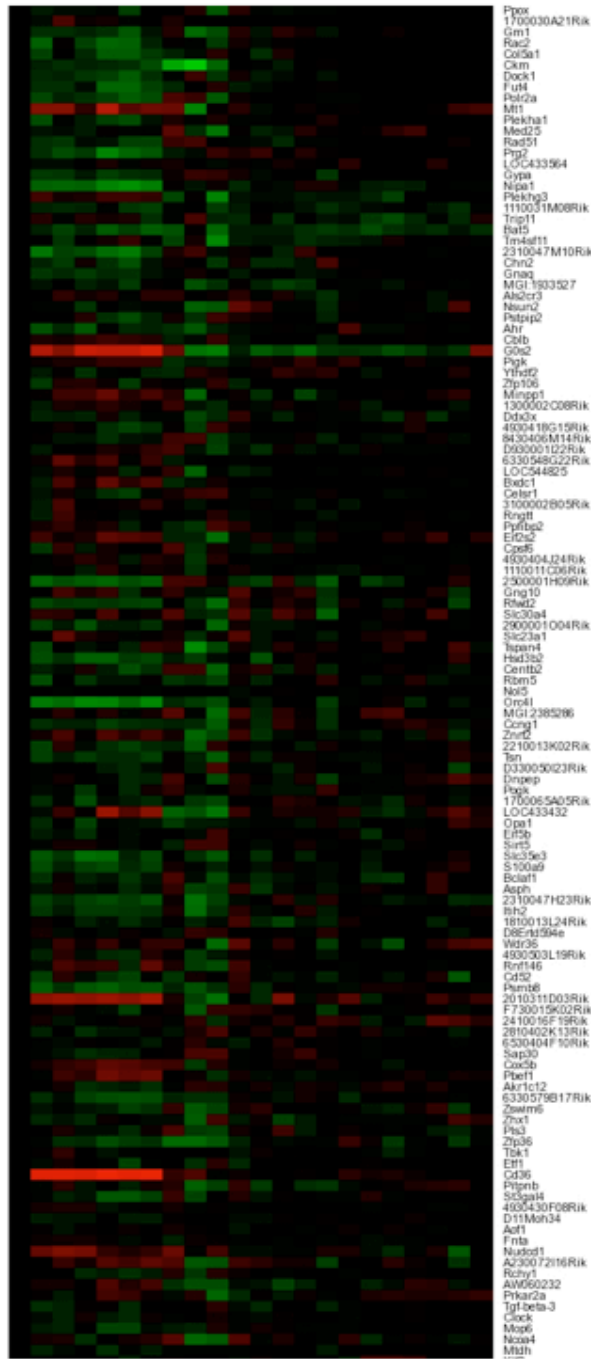

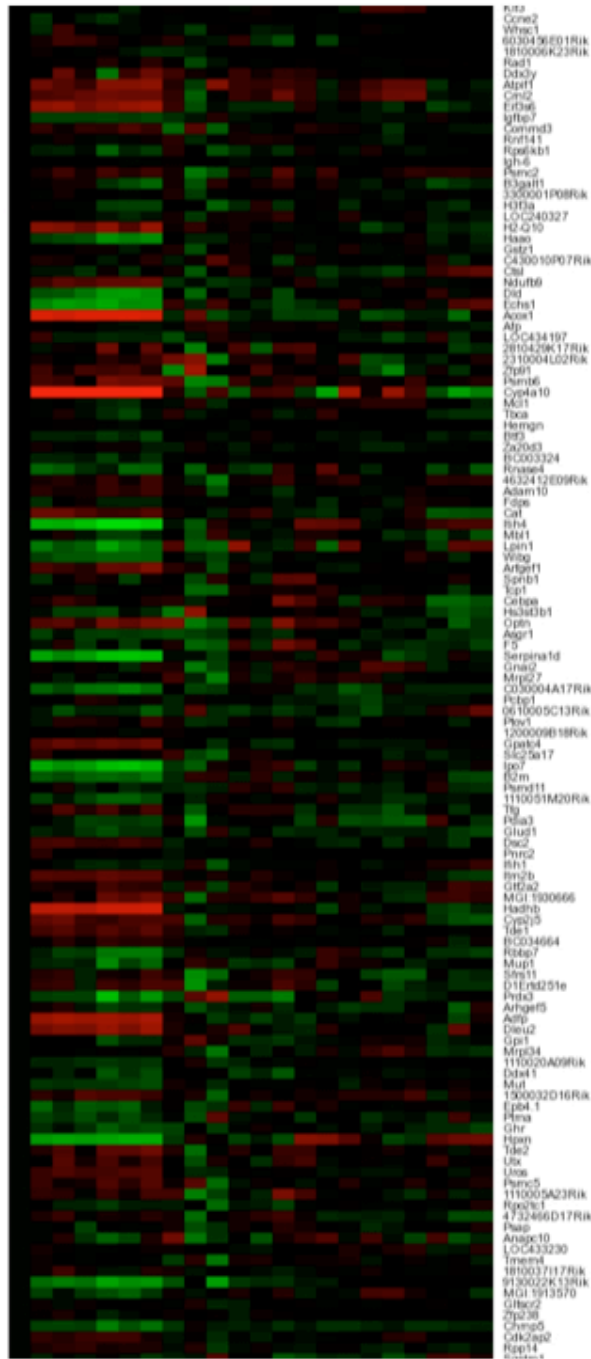

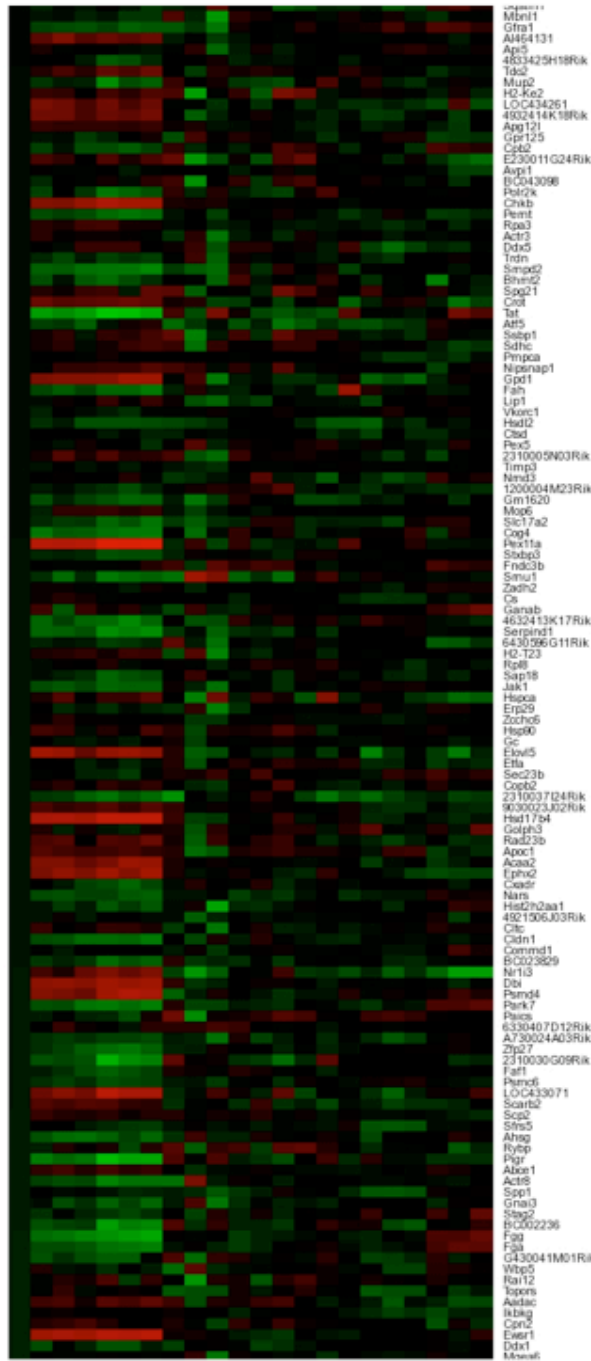

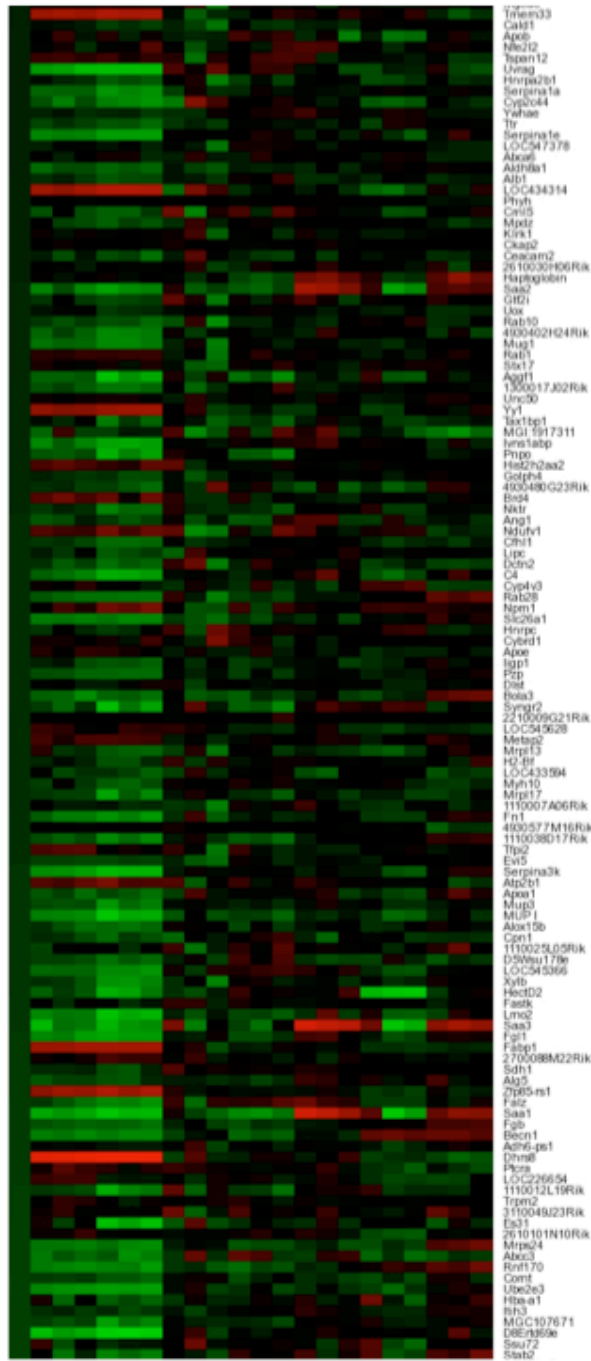

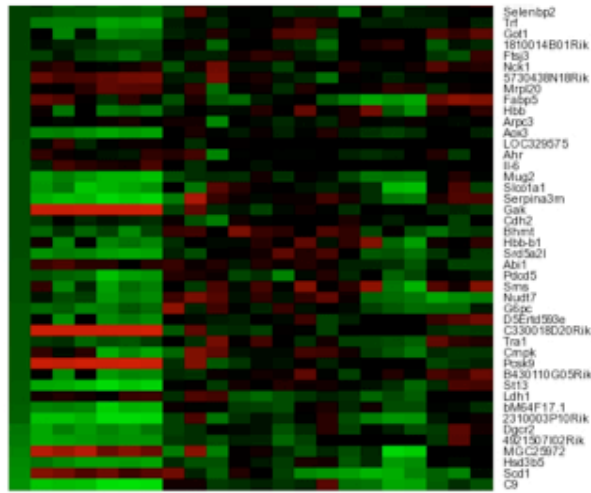

Query results returned in 21.86 secs.



FIGURE S3. Focused microarray results for C57BL/6 mice treated with PB (PHB),  $\beta$ NF (BNF), ciprofibrate (CPFR), WYTH (Wyeth 14,643), PCN (pregnenolone-16 $\alpha$ -carbonitrile, and COIP (corn oil i.p.) and COPO (corn oil p.o.). NNMT (Nnmt) is marked. We thank C. A. Bradfield, University of Wisconsin, Madison, for this information. <http://edge.oncology.wisc.edu/>.

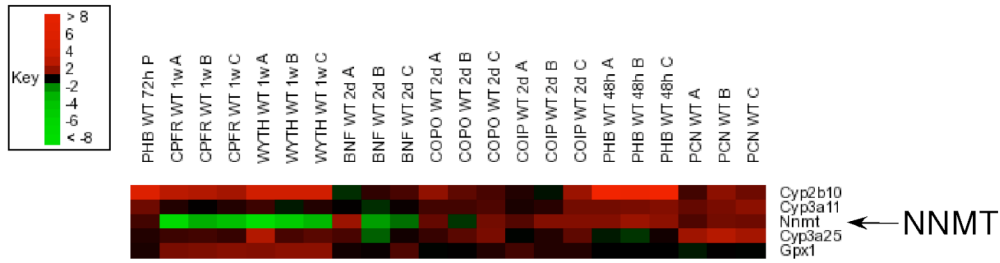

Supplement: M802447200_1.pdf [file M802447200_1.pdf]
